# Supplementary material for: Cerebral Venous Thrombosis Presenting in Early Pregnancy Complicated with Nausea and Vomiting: A Single-Institute Consecutive Case series and Literature Review
Source: Research Square preprint supplement (doi:10.21203/rs.3.rs-1317094/v1), 2022-02-07
Supplement: Supplementary file 1 [file 5f2e93648efb50bd9deab16f.docx]

Obstetrics department of Renji Hospital is Shanghai consultation and rescue center for critically ill pregnant women, the national "211 Project" key construction discipline, Shanghai top priority key discipline, and the first-class discipline (Class A) of Shanghai universities. Renji hospital established the first maternal intensive care unit (MICU) in Shanghai in 2015. In the field of critical obstetrics, the rescue of critically ill pregnant women accounts for about 1/3 to 1/4 of the city every year, ranks first among 6 critically ill consultation and rescue centers in Shanghai. Renji hospital has been making outstanding contributions to reducing the maternal mortality rate in Shanghai and even surrounding provinces and cities. Thus we would like to share our experience on some rare disease, to communicate with the world for our further improvement, like the present study, we reported consecutive 7 case serials of cerebral venous thrombosis presenting in early pregnancy complicated with nausea and vomiting, To the best of our knowledge, this is the largest series of CVT presenting in early pregnancy complicated with nausea and vomiting and with the longest post-pregnancy follow-up hitherto reported.
